# Supplementary material for: Impaired Expression of Rearranged Immunoglobulin Genes and Premature p53 Activation Block B Cell Development in BMI1 Null Mice
Source: PubMed Central journal article supplement — Cell Rep. Author manuscript; Available in PMC 2019 Feb 5. (PMC6362848; doi:10.1016/j.celrep.2018.12.030), 2019-01-02
Supplement: NIHMS1517818-supplement-1.pdf [file NIHMS1517818-supplement-1.pdf]

**Cell Reports, Volume 26**

**Supplemental Information**

**Impaired Expression of Rearranged Immunoglobulin**

**Genes and Premature p53 Activation Block**

**B Cell Development in BMI1 Null Mice**

**David J. Cantor, Bryan King, Lili Blumenberg, Teresa DiMauro, Iannis Aifantis, Sergei B. Koralov, Jane A. Skok, and Gregory David**

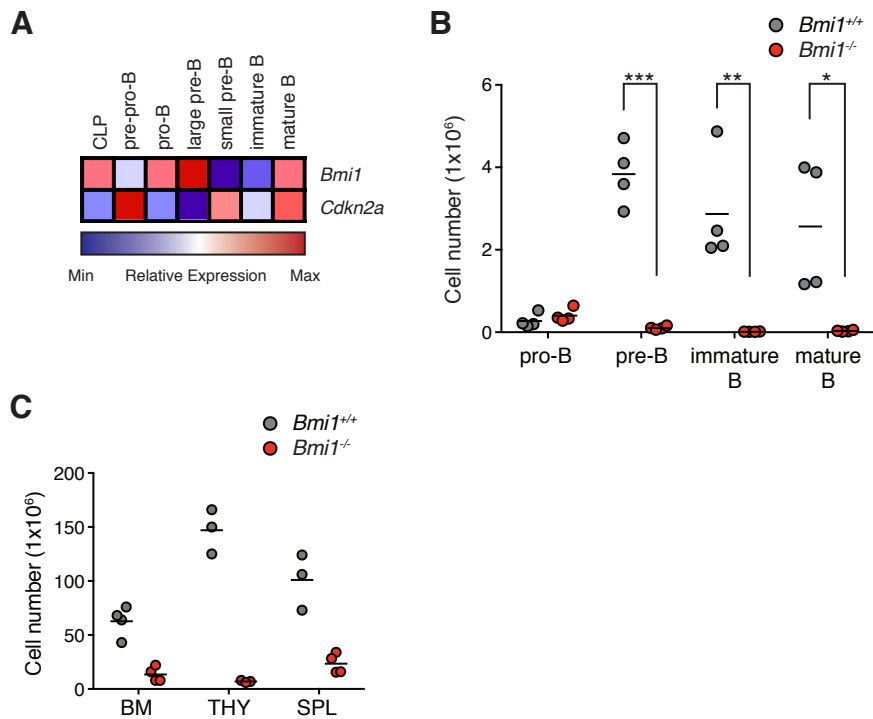

**Figure S1, related to Figure 1. BMI1 is highly expressed and functions at the pro-B to pre-B cell transition.**

(A) Expression pattern of *Bmi1* and *Cdkn2a* in developing B cells from the Immunological Genome Project (Painter et al., 2011). (B) Cell number of developing B cells in the bone marrow of indicated mice. Each point represents one animal; line represents the mean.  $n=4$  for each genotype. (C) Cellularity of bone marrow, thymus, and spleen from indicated mice. Each point represents one animal; line represents the mean.  $n \geq 3$  for each genotype. \*\*\* $p < 0.001$ , \*\* $p < 0.01$ , \* $p < 0.05$ . BM: bone marrow. THY: thymus. SPL: spleen.

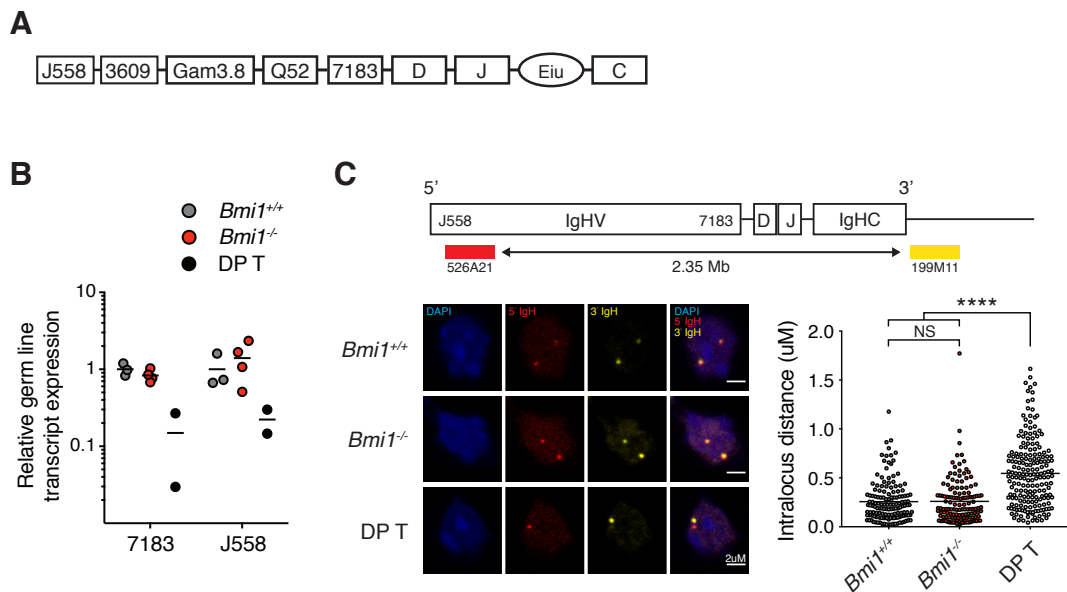

**Figure S2, related to Figure 2. BMI1 is not required for *Igh* germ line transcription or *Igh* contraction.** (A) Diagram of *Igh* locus with distal and proximal VH families indicated. (B) RT-qPCR expression analysis of germline transcription of both proximal (7183) and distal (J558) VH gene families from sorted pro-B cells from indicated mice. DP T were used as a negative control. Each point represents one animal; line represents the mean.  $n=3$  for *Bmi1*<sup>+/+</sup> animals;  $n=4$  for *Bmi1*<sup>-/-</sup> animals;  $n=2$  for DP T. (C) Analysis of *Igh* contraction in pro-B cells using 3-D microscopy with proximal and distal DNA FISH probes as depicted in the diagram. 2.35 Mb separate the two DNA FISH probes. Left: representative images. Scale bars, 2  $\mu$ M. Right: quantification of intralocus distance. DP T were used as a negative control. 2 independent experiments were done with >100 cells calculated for each genotype. Each point represents one cell; line represents the mean. \*\*\*\* $p < 0.0001$ , \* $p < 0.05$ . NS: not significant. DP T: double positive thymocytes.

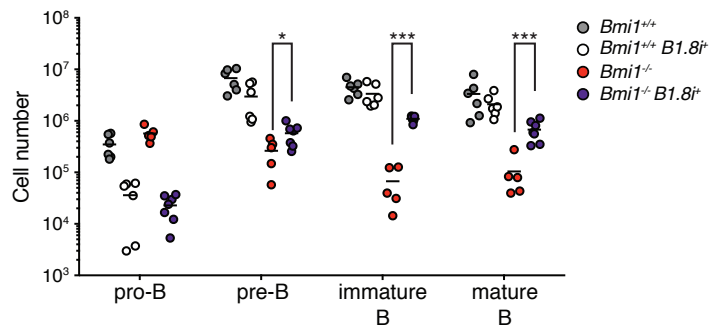

**Figure S3, related to Figure 3. Bypassing VDJ<sub>H</sub> rearrangement rescues B cell development in *Bmi1*<sup>-/-</sup> mice.**

Cell number of indicated progenitor B cell type in the bone marrow of indicated mice. Each point represents one animal; line represents the mean. n ≥ 5 for each genotype. \*\*\*p<0.001, \*p<0.05.

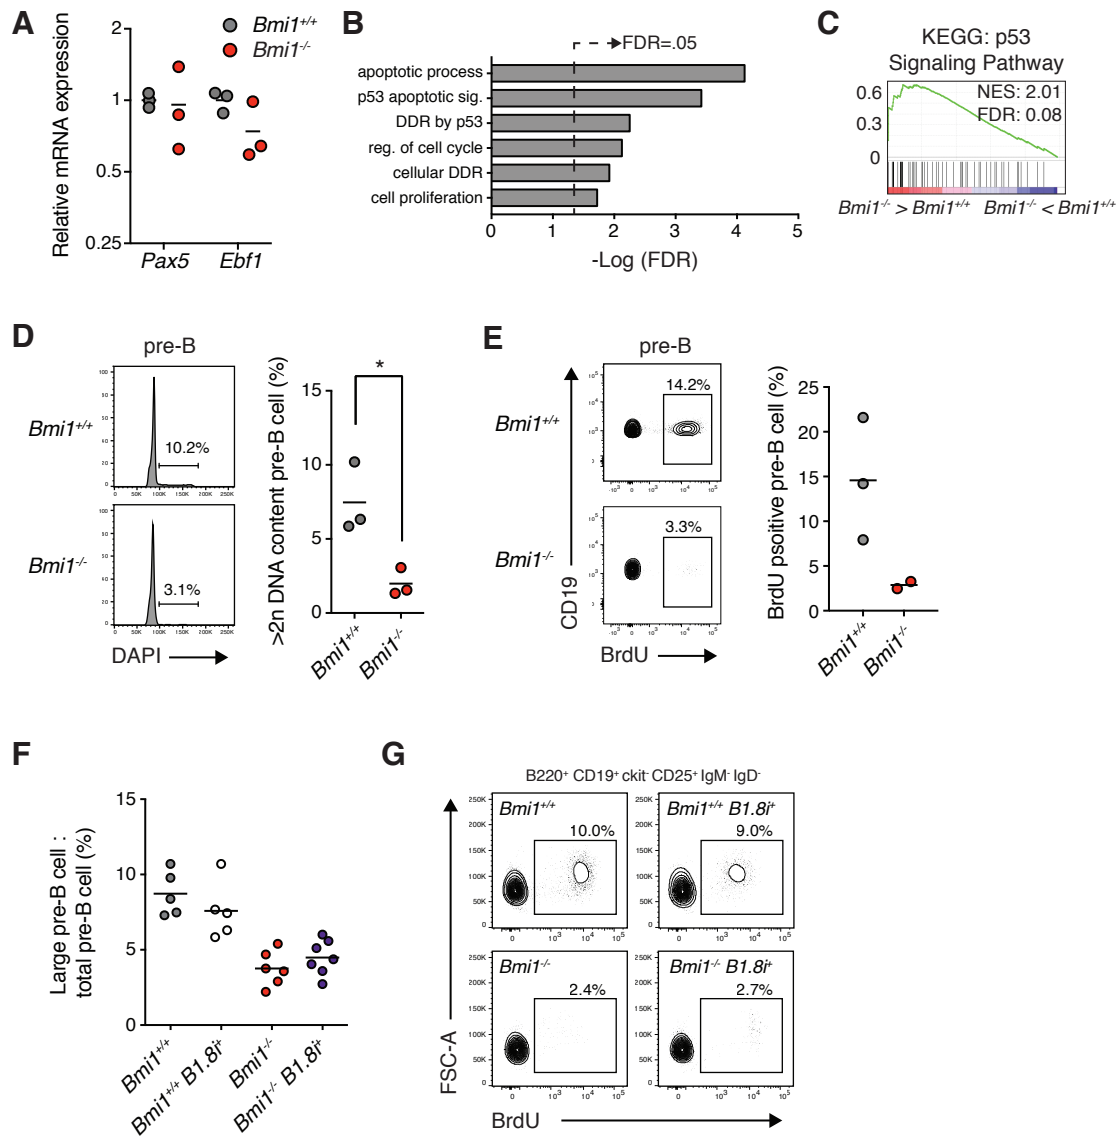

**Figure S4, related to Figure 4. BMI1 prevents inappropriate p53 signaling in pro-B cells.**

(A) mRNA expression levels as determined by RT-qPCR of indicated genes from pro-B cells of indicated mice. Each point represents one animal; line represents the mean.  $n=3$  for each genotype. (B) Gene ontology analysis of upregulated genes in *Bmi1*<sup>-/-</sup> pro-B cells. (C) Gene set enrichment analysis identified that the p53 signaling pathway is enriched in *Bmi1*<sup>-/-</sup> pro-B cells. (D) Representative FACS plot and frequency of pre-B cells that have >2n DNA content (cells in S-G2-M phases of cell cycle) in indicated mice. Each point represents one animal; line represents the mean.  $n=3$  for each genotype. (E) Representative FACS plot and frequency of BrdU<sup>+</sup> pre-B cells in indicated mice. Animals received an i.p. injection of 1mg BrdU and were analyzed two hours later. Each point represents one animal; line represents the mean.  $n=3$  for *Bmi1*<sup>+/+</sup> animals;  $n=2$  for *Bmi1*<sup>-/-</sup> animals. (F) The frequency of large pre-B cells present in the pre-B cell compartment of indicated mice. Each point represents one animal; line represents the mean.  $n \geq 5$  for each genotype. (G) FACS plot of BrdU<sup>+</sup> pre-B cells in indicated animals. Animals received an i.p. injection of 1mg BrdU and were analyzed two hours later.  $*p < 0.05$ .

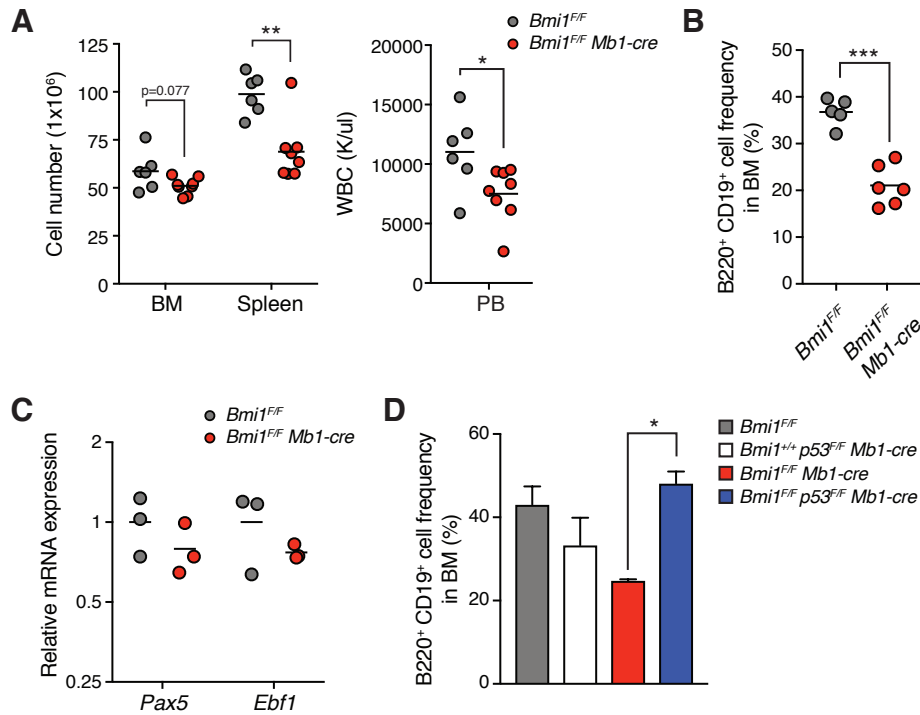

**Figure S5, related to Figure 5. BMI1 functions in a cell autonomous manner to regulate B cell development.**

(A) Cell number in the spleen, bone marrow, and peripheral blood of indicated mice. Each point represents one animal; line represents the mean.  $n=6$  for *Bmi1<sup>F/F</sup>* animals;  $n=8$  for *Bmi1<sup>F/F</sup> Mb1-cre* animals. (B) Frequency of B220<sup>+</sup> CD19<sup>+</sup> cells in the bone marrow of indicated mice. Each point represents one animal; line represents the mean.  $n=5$  for *Bmi1<sup>F/F</sup>* animals;  $n=6$  for *Bmi1<sup>F/F</sup> Mb1-cre* animals. (C) mRNA expression levels as determined by RT-qPCR of indicated genes from pro-B cells of indicated mice. Each point represents one animal; line represents the mean.  $n=3$  for each genotype. (D) Frequency of B220<sup>+</sup> CD19<sup>+</sup> cells in the bone marrow of indicated mice. Data represents mean  $\pm$  sem.  $n=3$  for each genotype. \*\*\* $p<0.001$ , \*\* $p<0.01$ , \* $p<0.05$ . BM: bone marrow. PB: peripheral blood. WBC: white blood cell.

| <b>Cell Population</b>   | <b>Cell-surface phenotypes</b>                                                                                                |
|--------------------------|-------------------------------------------------------------------------------------------------------------------------------|
| Pro-B                    | B220 <sup>+</sup> CD19 <sup>+</sup> ckit <sup>+</sup> CD25 <sup>-</sup> IgM <sup>-</sup> IgD <sup>-</sup>                     |
| Pre-B                    | B220 <sup>+</sup> CD19 <sup>+</sup> ckit <sup>-</sup> CD25 <sup>+</sup> IgM <sup>-</sup> IgD <sup>-</sup>                     |
| Large Pre-B              | B220 <sup>+</sup> CD19 <sup>+</sup> ckit <sup>-</sup> CD25 <sup>+</sup> IgM <sup>-</sup> IgD <sup>-</sup> FSC <sup>high</sup> |
| Small Pre-B              | B220 <sup>+</sup> CD19 <sup>+</sup> ckit <sup>-</sup> CD25 <sup>+</sup> IgM <sup>-</sup> IgD <sup>-</sup> FSC <sup>low</sup>  |
| Immature B               | B220 <sup>+</sup> CD19 <sup>+</sup> IgM <sup>+</sup> IgD <sup>-</sup>                                                         |
| Mature (recirculating) B | B220 <sup>+</sup> CD19 <sup>+</sup> IgM <sup>+</sup> IgD <sup>+</sup>                                                         |
| DP Thymocytes            | Lin (B220, TER119, Gr1, CD11b) <sup>-</sup> CD4 <sup>+</sup> CD8 <sup>+</sup>                                                 |

**Table S2, related to STAR methods. Flow cytometry cell surface phenotypes.**

| Gene                          | 5' oligo                                      | 3' oligo                           |
|-------------------------------|-----------------------------------------------|------------------------------------|
| <i>Hprt</i>                   | AGG TTG CAA GCT TGC TGG T                     | TGA AGT ACT CAT TAT AGT CAA GGG CA |
| <i>Bmi1</i>                   | TGC AGA TGA GGA GAA GAG GA                    | TCA TTC ACC TCT TCC TTA GGC        |
| <i>p19<sup>Arf</sup></i>      | GCT CTG GCT TTC GTG AAC ATG                   | TCG AAT CTG GAC CGT AGT TGA G      |
| <i>Bbc3</i>                   | CTG GAG GGT CAT GTA CAA TCT C                 | GGT GTC AGA AGG CGG AG             |
| <i>Pmapil</i>                 | CGG ACA TAA CTG TGG TTC TGG                   | ACA CTC GTC CTT CAA GTC TGC        |
| <i>Bax</i>                    | AAA CTG GTG CTC AAG GCC C                     | CTT GGA TCC AGA CAA GCA GC         |
| <i>Phlda3</i>                 | AGA CAT GTC AGC TTC TCT GTC C                 | CTA CTG GCT TCT GCT CTC CG         |
| <i>Cdkn1a</i>                 | AGA GAC AAC GGC ACA CTT TG                    | CAG ACA TTC AGA GC CACA GG         |
| <i>Trp53</i>                  | TGA ACC GCC GAC CTA TCC TTA CC                | CCC AGG GCA GGC ACA AAC AC         |
| <i>Pax5</i>                   | GGA CCA TCA GGA CAG GAC AT                    | ACA GCA ATG GGA TAC GGA CA         |
| <i>Ebfl</i>                   | ACA GCA ATG GGA TAC GGA CA                    | CGT GTG TGA GCA ATA CTC GG         |
| D <sub>H</sub> -C $\mu$       | TTC AAA GCA CAA TGC CTG GCT                   | ATG CAG ATC TCT GTT TTT GCC TCC    |
| V <sub>H</sub> 7183-C $\mu$   | CGG TAC CAA GAA SAM CCT GTW CCT GCA AAT GAS C | ATG CAG ATC TCT GTT TTT GCC TCC    |
| V <sub>H</sub> Q52-C $\mu$    | CGG TAC CAG ACT GAR CAT CAS CAA GGA CAA YTC   | ATG CAG ATC TCT GTT TTT GCC TCC    |
| V <sub>H</sub> Gam3.8-C $\mu$ | CAA GGG ACG GTT TGC CTT CTC TTT GGA A         | ATG CAG ATC TCT GTT TTT GCC TCC    |
| V <sub>H</sub> 3609-C $\mu$   | KCY YTG AAG AGC CRR CTC ACA ATC TCC           | ATG CAG ATC TCT GTT TTT GCC TCC    |
| V <sub>H</sub> J558-C $\mu$   | CGA GCT CTC CAR CACA GC CTW CAT GCA RCT CAR C | ATG CAG ATC TCT GTT TTT GCC TCC    |
| V <sub>H</sub> 7183 GLT       | GCC TCT GGA TTC ACT TTC AG                    | CAT TGT CTC TGG AGA TGG TG         |
| V <sub>H</sub> J558 GLT       | CTT CTG GCT ACA CCT TCA C                     | CTG AGC TGC ATG TAG GCT G          |

K: G,T M: A,C R: A,G S: C,G W: A,T Y: C,T

**Table S3, related to STAR methods. mRNA expression RT-qPCR primer pairs.**



| <b>DNA product</b> | <b>5' oligo</b>                                  | <b>3' oligo</b>                                  |
|--------------------|--------------------------------------------------|--------------------------------------------------|
| $D_H - J_{H3}$     | TTC AAA GCA CAA TGC CTG<br>GCT                   | GTC TAG ATT CTC ACA AGA<br>GTC CGA TAG ACC CTG G |
| $V_H7183 - J_{H3}$ | CGG TAC CAA GAA SAM CCT<br>GTW CCT GCA AAT GAS C | GTC TAG ATT CTC ACA AGA<br>GTC CGA TAG ACC CTG G |
| $V_HJ558 - J_{H3}$ | CGA GCT CTC CAR CACA GC<br>CTW CAT GCA RCT CAR C | GTC TAG ATT CTC ACA AGA<br>GTC CGA TAG ACC CTG G |
| $C_\mu$            | TGG CCA TGG GCT GCC TAG<br>CCC GGG ACT T         | GCC TGA CTG AGC TCA CAC<br>AAG GAG GA            |
| $MsVHe - J_{H3}$   | GGG AAT TCG AGG TGC AGC<br>TGC AGG AGT CTG G     | GTC TAG ATT CTC ACA AGA<br>GTC CGA TAG ACC CTG G |

R: A,G S: C,G W: A,T

**Table S4, related to STAR methods. Primer pairs for analysis of  $VDJ_H$  joints.**
